# Supplementary material for: CD8+ T-cell pathogenicity in Rasmussen encephalitis elucidated by large-scale T-cell receptor sequencing
Source: PubMed Central journal article supplement (PMC4822013; doi:10.1038/ncomms11153), 2016-04-04
Supplement: ncomms11153-s1.pdf [file ncomms11153-s1.pdf]

Supplementary figure 1

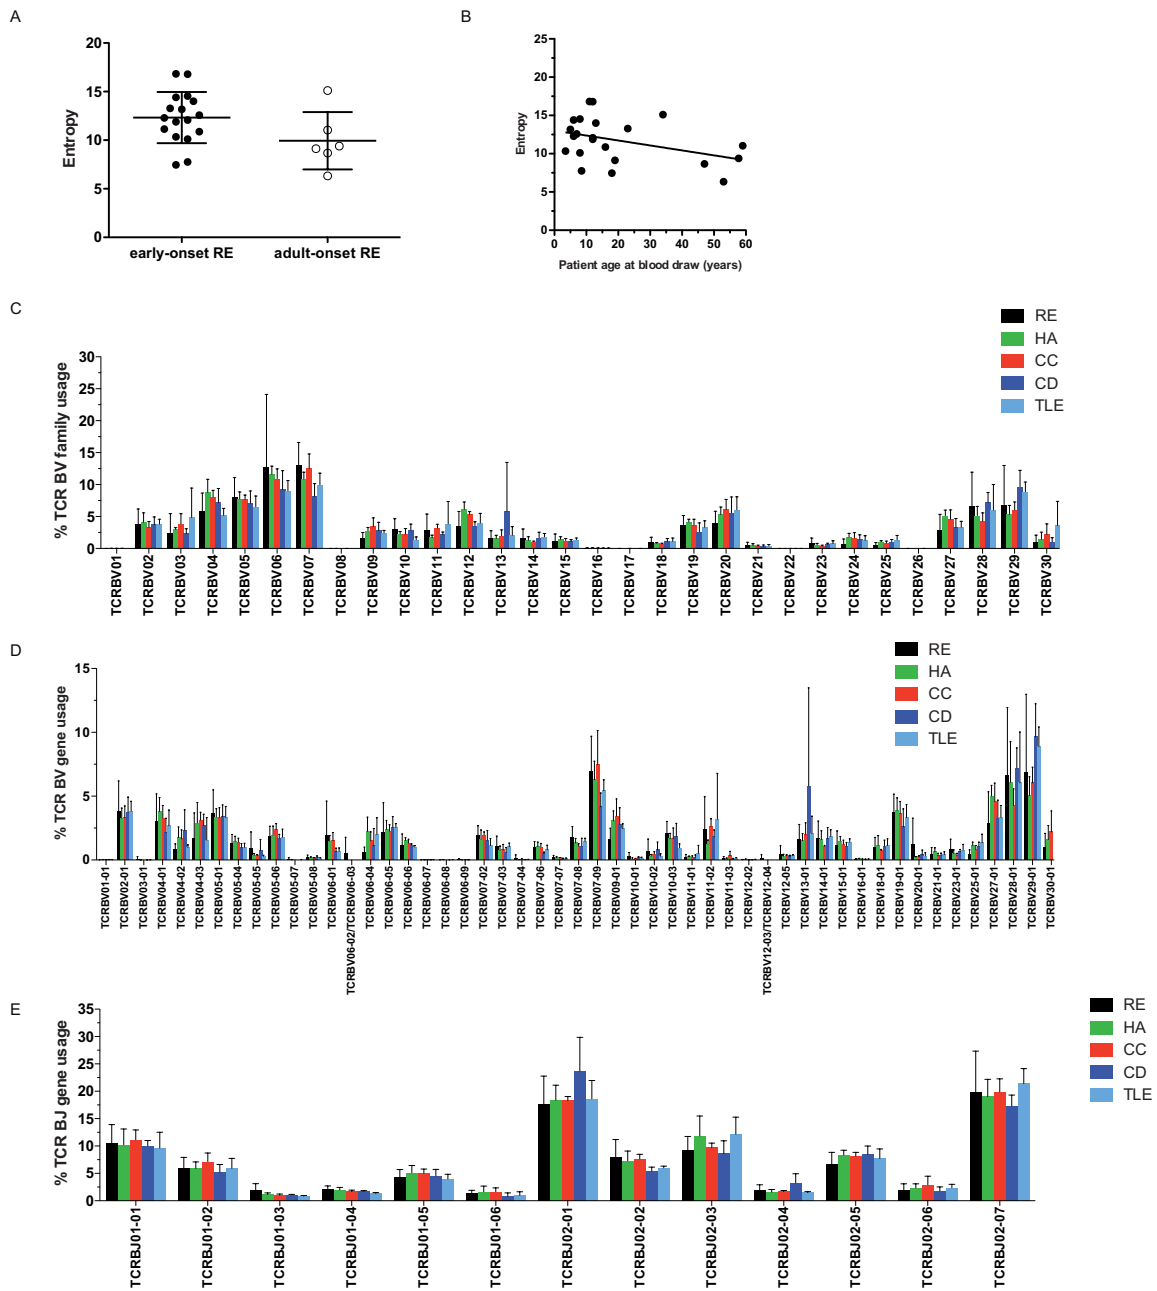

Supplementary Figure 1: Periphery

A) comparison between entropy of early-onset RE (n=17) and adult-onset RE (n=6)(not significant), B) correlation between entropy and patient age at blood draw (in years)(not significant), C) V $\beta$  family usage in the periphery of the patient groups, D) V $\beta$  gene usage in the periphery of the patient groups, E) J $\beta$  gene usage in the periphery of the patient groups.

Supplementary figure 2

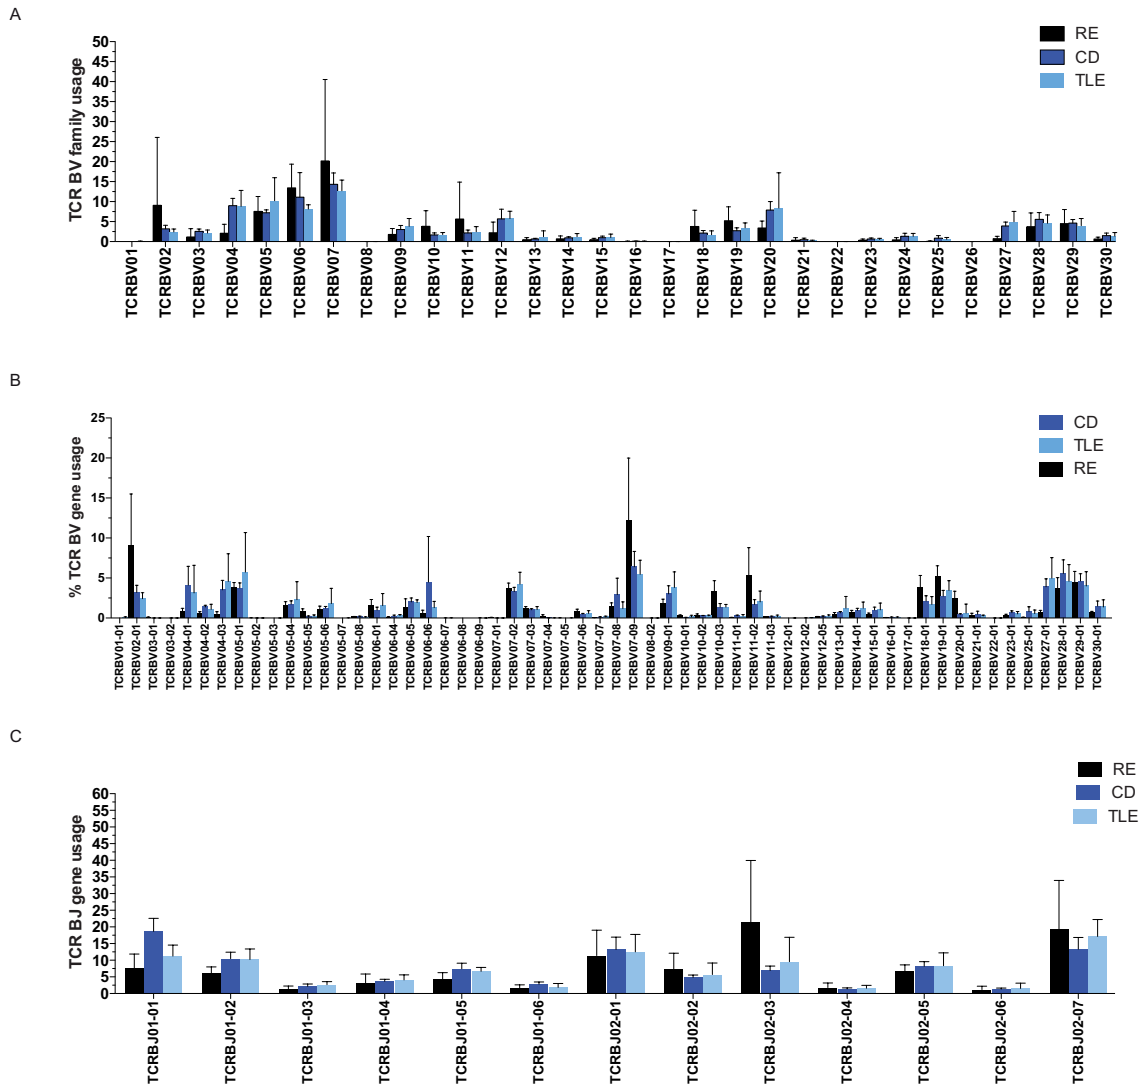

Supplementary Figure 2: CNS

A) V $\beta$  family usage in the CNS of the patient groups, D) V $\beta$  gene usage in the CNS of the patient groups, E) J $\beta$  gene usage in the CNS of the patient groups.

Supplementary figure 3

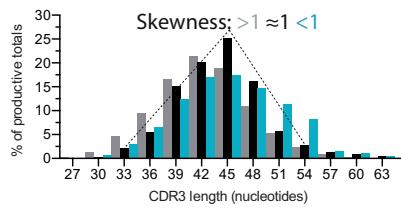

Supplementary Figure 3: Examples for skewness

Skewness is a statistical measure of the asymmetry of the probability (Gaussian) distribution of a random variable about its mean. The graph shows examples for three CDR3 length distributions: normally distributed (black, skewness=1), shifted to smaller CDR3 lengths (gray, skewness >1), or shifted to larger CDR3 lengths (blue, skewness <1).

Supplementary Table 1

| #     | Year of birth | Age at sampling | Diagnosis | Sample type        |
|-------|---------------|-----------------|-----------|--------------------|
| HA01  | 2001          | 14              | HA        | per. Blood CD8     |
| HA02  | 2000          | 15              | HA        | per. Blood CD8     |
| HA03  | 2001          | 14              | HA        | per. Blood CD8     |
| HA04  | 1996          | 19              | HA        | per. Blood CD8     |
| HA05  | 2000          | 15              | HA        | per. Blood CD8     |
| HA06  | 2000          | 15              | HA        | per. Blood CD8     |
| HA07  | 1996          | 19              | HA        | per. Blood CD8     |
| HA08  | 1999          | 16              | HA        | per. Blood CD8     |
| CC01  | 2005          | 10              | CC        | per. Blood CD8     |
| CC02  | 2003          | 12              | CC        | per. Blood CD8     |
| CC03  | 1997          | 18              | CC        | per. Blood CD8     |
| CC04  | 1999          | 16              | CC        | per. Blood CD8     |
| CC05  | 2006          | 9               | CC        | per. Blood CD8     |
| CD01  | 1990          | 25              | CD        | per. Blood CD8     |
| CD02  | 1999          | 16              | CD        | per. Blood CD8     |
| CD03  | 2010          | 5               | CD        | per. Blood CD8     |
| CD04  | 2000          | 15              | CD        | per. Blood CD8     |
| CD05  | 2006          | 9               | CD, CC    | per. Blood CD8     |
| CD06  | n.a.          | 13              | CD        | CNS resection      |
| CD07  | n.a.          | 5               | CD        | CNS resection      |
| CD08  | n.a.          | 14              | CD        | CNS resection      |
| CD09  | n.a.          | 9               | CD        | CNS resection      |
| TLE01 | 2005          | 10              | TLE       | per. Blood CD8     |
| TLE02 | 2006          | 9               | TLE       | per. Blood CD8     |
| TLE03 | 2001          | 14              | TLE       | per. Blood CD8     |
| TLE04 | 2002          | 13              | TLE       | per. Blood CD8     |
| TLE05 | 2004          | 11              | TLE, CC   | per. Blood CD8     |
| TLE06 | n.a.          | 11              | TLE       | CNS resection      |
| TLE07 | n.a.          | 10              | TLE       | CNS resection      |
| TLE08 | n.a.          | 14              | TLE       | CNS resection      |
| TLE09 | n.a.          | 13              | TLE       | CNS resection (2x) |
| TLE10 | n.a.          | 5               | TLE       | CNS resection      |
| TLE11 | n.a.          | 11              | TLE       | CNS resection      |
| TLE12 | n.a.          | 10              | TLE       | CNS resection      |
| TLE13 | n.a.          | 44              | TLE       | CNS resection      |

Details of the control patient cohort

Supplementary Table 2

| Patient                         | RE #01     | RE #02         | RE #23          | TLE #11          | CD #05      |
|---------------------------------|------------|----------------|-----------------|------------------|-------------|
| Silent nucleotide substitutions | 291        | 11             | 18              | 20               | 5           |
| Single amino acid substitutions | 21         | 1              | 22              | 5                | 2           |
| Amino acid sequence             | CASSGYEQYF | CASSLGGGGDTQYF | CASRTTGPNDTQYF  | CASSSGRTGTDYEQYF | CASSPATEAFF |
| CDR3 length (nucleotides)       | 30         | 42             | 42              | 48               | 33          |
| TCRVB                           | TCRBV02-01 | TCRBV11-02     | TCRBV07-09      | TCRBV05-01       | TCRBV06-06  |
| TCRJB                           | TCRBJ02-07 | TCRBJ02-03     | TCRBJ02-03      | TCRBJ02-07       | TCRBJ01-01  |
| Frequency (CNS)                 | 49.1%      | 26.8%          | 52.8%           | 16.0%            | 12.6%       |
| Substituted clones              | CATSGYEQYF | GASSLGGGGDTQYF | CASRTAGPNDTQYF  | CASSPGRTGTDYEQYF | CARSPATEAFF |
|                                 | CAISGYEQYF |                | CASRTPGPNDTQYF  | CASSQGRGTDYEQYF  | CASSTATEAFF |
|                                 | CGSSGYEQYF |                | CASRTTGPSDTQYF  | CASSSGRTGTDYEPYF |             |
|                                 | CASSGSEQYF |                | CASRTTGPREDTQYF | CASSSGRTGTDYELYF |             |
|                                 | CASRGHEQYF |                | CASRTTGPTDTQYF  | CASSSGRPGTDYEQYF |             |
|                                 | CASSGDEQYF |                | CASRTPGPNDTQYF  |                  |             |
|                                 | GASSGYEQYF |                | CASRATGPNDTQYF  |                  |             |
|                                 | FASSGYEQYF |                | RASRTTGPNDTQYF  |                  |             |
|                                 | CASSGGEQYF |                | CGSRTTGPNDTQYF  |                  |             |
|                                 | WASSGYEQYF |                | WASRTTGPNDTQYF  |                  |             |
|                                 | CASSTYEQYF |                | GASRTTGPNDTQYF  |                  |             |
|                                 | CASSEYEQYF |                | CASRTTGPNETQYF  |                  |             |
|                                 | CASSRYEQYF |                | CASRTTGPNGTQYF  |                  |             |
|                                 | CASSQYEQYF |                | CASRTTGPNDAQYF  |                  |             |
|                                 | CASSKYEQYF |                | CASSTTGPNDTQYF  |                  |             |
|                                 | CASSDYEYF  |                | CPSTTGPNDTQYF   |                  |             |
|                                 | CASSPYEQYF |                | CCSRTTGPNDTQYF  |                  |             |
|                                 | CASSWYEQYF |                | CTSRTTGPNDTQYF  |                  |             |
|                                 | CASSSYEQYF |                | FASRTTGPNDTQYF  |                  |             |
|                                 | CPSSGYEQYF |                | SASRTTGPNDTQYF  |                  |             |
|                                 | CASSGCEQYF |                | CARRTGPNDTQYF   |                  |             |
|                                 |            |                | CASSTTGPNDTQYF  |                  |             |

Listed are the number of silent nucleotide substitutions, single amino acid substitutions, amino acid sequence of the expansion, CDR3 length in nucleotides, V $\beta$  and J $\beta$  genes, frequency in the respective CNS, and the clonotypes with the single amino acid substitutions (with the substitution in red).

Supplementary Table 3

| Ctrl-specific common clones |            |            |                            |                                 |
|-----------------------------|------------|------------|----------------------------|---------------------------------|
| amino acid                  | TCRBV      | TCRBJ      | % of peripheral RE samples | % of peripheral control samples |
| CASSQEGGISEAFF              | TCRBV04-03 | TCRBJ01-01 | 0                          | 73.91                           |
| CASSQEKGDQPQHF              | TCRBV04-01 | TCRBJ01-05 | 0                          | 65.22                           |
| CASSSAGGPTYEQYF             | TCRBV27-01 | TCRBJ02-07 | 0                          | 60.87                           |
| CASSETGGSYNEQFF             | TCRBV04-01 | TCRBJ02-01 | 0                          | 39.13                           |
| CASSPTSFGDNEQFF             | TCRBV05-06 | TCRBJ02-01 | 0                          | 39.13                           |
| CSVVNNEQFF                  | TCRBV29-01 | TCRBJ02-01 | 0                          | 34.78                           |
| CAWSGRGEQFF                 | TCRBV30-01 | TCRBJ02-01 | 0                          | 34.78                           |
| CASRQGWNEQFF                | TCRBV19-01 | TCRBJ02-01 | 0                          | 34.78                           |
| CASSPVQDNEKLFF              | TCRBV18-01 | TCRBJ01-04 | 0                          | 34.78                           |
| CASSFLDSDQPQHF              | TCRBV28-01 | TCRBJ01-05 | 0                          | 30.43                           |
| CASSDVGYGNTIYF              | TCRBV25-01 | TCRBJ01-03 | 0                          | 30.43                           |
| CATSRDRGNEKLFF              | TCRBV15-01 | TCRBJ01-04 | 0                          | 30.43                           |
| CASSPLDGLRNEQFF             | TCRBV28-01 | TCRBJ02-01 | 0                          | 30.43                           |
| CASRERGQSTGELFF             | TCRBV19-01 | TCRBJ02-02 | 0                          | 30.43                           |
| CASSMSGARAKNIQYF            | TCRBV28-01 | TCRBJ02-04 | 0                          | 30.43                           |
| CASSDPAEQTDDTQYF            | TCRBV02-01 | TCRBJ02-03 | 0                          | 30.43                           |
| CASSLRPDTQYF                | TCRBV13-01 | TCRBJ02-03 | 0                          | 26.09                           |
| CALDISGANVLTFF              | TCRBV30-01 | TCRBJ02-06 | 0                          | 26.09                           |
| CSVRRGGAPQETQYF             | TCRBV29-01 | TCRBJ02-05 | 0                          | 26.09                           |
| CASSWSGTHNEQFF              | TCRBV27-01 | TCRBJ02-01 | 0                          | 26.09                           |
| CASTYSGGDTEAFF              | TCRBV09-01 | TCRBJ01-01 | 0                          | 26.09                           |
| CASSVKGGTDTQYF              | TCRBV06-04 | TCRBJ02-03 | 0                          | 26.09                           |
| CASSAPGLVAGPQYF             | TCRBV09-01 | TCRBJ02-05 | 0                          | 26.09                           |
| CASSEVAGVGDQYF              | TCRBV10-02 | TCRBJ02-03 | 0                          | 26.09                           |
| CASSLRWVSLNTEAFF            | TCRBV27-01 | TCRBJ01-01 | 0                          | 26.09                           |
| CASSPPSGGAQETQYF            | TCRBV04-01 | TCRBJ02-05 | 0                          | 26.09                           |
| CATSRGTSDDTQYF              | TCRBV15-01 | TCRBJ02-03 | 0                          | 26.09                           |
| CASSDESETQYF                | TCRBV18-01 | TCRBJ02-05 | 0                          | 21.74                           |
| CASSRDRAQQYF                | TCRBV14-01 | TCRBJ02-07 | 0                          | 21.74                           |
| CASSLLYMDTQYF               | TCRBV19-01 | TCRBJ02-03 | 0                          | 21.74                           |
| CASTRQVYQETQYF              | TCRBV28-01 | TCRBJ02-05 | 0                          | 21.74                           |
| CASSLRAPTGELEFF             | TCRBV28-01 | TCRBJ02-02 | 0                          | 21.74                           |
| CASSFGGSSYEQYF              | TCRBV14-01 | TCRBJ02-07 | 0                          | 21.74                           |
| CASTHWRGTDQYF               | TCRBV23-01 | TCRBJ02-03 | 0                          | 21.74                           |
| CASSLNHYVEKLEFF             | TCRBV05-06 | TCRBJ01-04 | 0                          | 21.74                           |
| CASSSPGQANEKLEFF            | TCRBV05-01 | TCRBJ01-04 | 0                          | 21.74                           |
| CASSLSDLGRTDEQYF            | TCRBV27-01 | TCRBJ02-07 | 0                          | 21.74                           |
| CATPPGTSGNTDTQYF            | TCRBV23-01 | TCRBJ02-03 | 0                          | 21.74                           |
| CASSSSSGVSSYNEQFF           | TCRBV09-01 | TCRBJ02-01 | 0                          | 21.74                           |
| CASSLGSSREGPDTQYF           | TCRBV13-01 | TCRBJ02-03 | 0                          | 21.74                           |
| CASSPRTDGYTF                | TCRBV07-02 | TCRBJ01-02 | 0                          | 17.39                           |
| CASRDTGTEAFF                | TCRBV06-05 | TCRBJ01-01 | 0                          | 17.39                           |
| CAWAASPDSEQYF               | TCRBV30-01 | TCRBJ02-07 | 0                          | 17.39                           |
| CATSREGREYGYTF              | TCRBV15-01 | TCRBJ01-02 | 0                          | 17.39                           |
| CASNQQGVNTEAFF              | TCRBV02-01 | TCRBJ01-01 | 0                          | 17.39                           |
| CASSLAAGVETQYF              | TCRBV05-06 | TCRBJ02-05 | 0                          | 17.39                           |
| CAWSVQSGTYEQYF              | TCRBV30-01 | TCRBJ02-07 | 0                          | 17.39                           |
| CASTDSGSLYEQYF              | TCRBV05-01 | TCRBJ02-07 | 0                          | 17.39                           |
| CASSPTGRGEKLEFF             | TCRBV25-01 | TCRBJ01-04 | 0                          | 17.39                           |
| CASRDRGSTNEKLEFF            | TCRBV04-03 | TCRBJ01-04 | 0                          | 17.39                           |

Listed are the clonotypes (amino acid sequence, V $\beta$  and J $\beta$  genes, frequency in either RE patients or control patients). V $\beta$  genes in green are over-expressed in RE-specific clones (please see Figure 4 for details and Table 2 for the respective list of RE-specific clones).

Supplementary Table 4

| Amino acid         | TCRBV | TCRBJ |                   |                   |                   |  |
|--------------------|-------|-------|-------------------|-------------------|-------------------|--|
|                    |       |       | <b>RE #05-a</b>   | <b>RE #05-CNS</b> |                   |  |
| CASSDYAGVTDQYF     | 06-01 | 02-03 | 0.1265            | 0.3426            |                   |  |
| CASSKGQPSEQFF      | 19-01 | 02    | 0.1960            | 0.2840            |                   |  |
| CASSVLGRGASEQFF    | 09-01 | 02-01 | 0.0086            | 0.0538            |                   |  |
| CASSLGQGYEQYF      | 27-01 | 02-07 | 0.0051            | 0.0227            |                   |  |
| CASSKGQPSDYTF      | 19-01 | 01-02 | 0.0002            | 0.0052            |                   |  |
|                    |       |       | <b>RE #05-b</b>   | <b>RE #05-CNS</b> |                   |  |
| CATPGPTGELFF       | 10-03 | 02-02 | 0.1171            | 8.1123            |                   |  |
| CSGAQGGEKLFF       | 29-01 | 01-04 | 0.0092            | 3.2679            |                   |  |
| CASSMRSTDQYF       | 19-01 | 02-03 | 0.9580            | 1.7971            |                   |  |
| CASSYNYGYTF        | 07-02 | 01-02 | 0.0053            | 1.7530            |                   |  |
| CASSLEAGSNEKLFF    | 07-06 | 01-04 | 0.0437            | 0.4094            |                   |  |
| CASSDYAGVTDQYF     | 06-01 | 02-03 | 1.4232            | 0.3426            |                   |  |
| CASSKGQPSEQFF      | 19-01 | 02    | 0.0960            | 0.2840            |                   |  |
| CASSDPSSYNSPLHF    | 02-01 | 01-06 | 0.0259            | 0.1200            |                   |  |
| CASSRTGENQPQHF     | 27-01 | 01-05 | 0.0016            | 0.0830            |                   |  |
| CASSLDGPLDEQYF     | 11-02 | 02-07 | 0.0066            | 0.0804            |                   |  |
|                    |       |       | <b>RE #05-a</b>   | <b>RE #05-b</b>   |                   |  |
| CASSDYAGVTDQYF     | 06-01 | 02-03 | 0.1265            | 1.4232            |                   |  |
| CASSLRGTEAFF       | 05-06 | 01-01 | 0.2911            | 0.5471            |                   |  |
| CASSFPLTGRMDTEAFF  | 07-09 | 01-01 | 0.1560            | 0.2429            |                   |  |
| CSVEDPDVHGGYTF     | 29-01 | 01-02 | 0.1465            | 0.2185            |                   |  |
| CASSKGQPSEQFF      | 19-01 | 02    | 0.1966            | 0.0965            |                   |  |
| CASSQEAGVYYNEQFF   | 04-01 | 02-01 | 0.0875            | 0.0619            |                   |  |
| CASSPGAGITEAFF     | 07-09 | 01-01 | 0.0082            | 0.1425            |                   |  |
| CASSEARGLAVQETQYF  | 02-01 | 02-05 | 0.0926            | 0.0484            |                   |  |
| CSVEVNTEAFF        | 29-01 | 01-01 | 0.0668            | 0.0625            |                   |  |
| CSARKEGVYNEQFF     | 20-01 | 02-01 | 0.0575            | 0.0681            |                   |  |
|                    |       |       | <b>RE #05-a</b>   | <b>RE #05-b</b>   | <b>RE #05-CNS</b> |  |
| CASSDYAGVTDQYF     | 06-01 | 02-03 | 0.1265            | 1.4232            | 0.3426            |  |
| CASSKGQPSEQFF      | 19-01 | 02    | 0.1966            | 0.0965            | 0.2840            |  |
|                    |       |       | <b>RE #05-a</b>   | <b>ST</b>         |                   |  |
| CASSVQGNTTEAFF     | 19-01 | 01-01 | 0.0175            | 0.0007            |                   |  |
| CASSLGGGYEQYF      | 27-01 | 02-07 | 0.0005            | 0.0007            |                   |  |
|                    |       |       | <b>RE #05-b</b>   | <b>ST</b>         |                   |  |
| CASSLGKNIQYF       | 11-02 | 02-04 | 0.0247            | 5.8354            |                   |  |
| CASSLGNEQFF        | 07-08 | 02-01 | 0.0010            | 2.4605            |                   |  |
| CSVGTGGTNEKLFF     | 29-01 | 01-04 | 0.0574            | 0.0049            |                   |  |
| CASSFSYEQYF        | 13-01 | 02-07 | 0.0368            | 0.0007            |                   |  |
| CASSLRETQYF        | 07-09 | 02-05 | 0.0260            | 0.0007            |                   |  |
| CASSLGRGTEAFF      | 05-01 | 01-01 | 0.0232            | 0.0007            |                   |  |
| CASSLGGDQPQHF      | 11-02 | 01-05 | 0.0164            | 0.0021            |                   |  |
| CASSDTGELFF        | 07-06 | 02-02 | 0.0147            | 0.0010            |                   |  |
| CASSLGEKLFF        | 07-09 | 01-04 | 0.0101            | 0.0007            |                   |  |
| CASSEDGMNTEAFF     | 10-02 | 01-01 | 0.0086            | 0.0049            |                   |  |
|                    |       |       | <b>RE #05-CNS</b> |                   |                   |  |
| CASSLSGTTSYEQYF    | 18-01 | 02-07 | 11.6287           |                   |                   |  |
| CATPGPTGELFF       | 10-03 | 02-02 | 8.1123            |                   |                   |  |
| CASSPPRTGELFF      | 06    | 02-02 | 3.8914            |                   |                   |  |
| CSGAQGGEKLFF       | 29-01 | 01-04 | 3.2679            |                   |                   |  |
| CSVEDPLGGGYSNQPQHF | 29-01 | 01-05 | 2.9435            |                   |                   |  |
| CSVGAQLAPHTDQYF    | 29-01 | 02-03 | 2.9273            |                   |                   |  |
| CASSLEATVRGEKLFF   | 05-01 | 01-04 | 2.1591            |                   |                   |  |
| CASSLTQGRDQYF      | 05-04 | 02-03 | 2.1500            |                   |                   |  |
| CAISSGGLRETQYF     | 10-03 | 02-05 | 1.9424            |                   |                   |  |
| CASSETGTSNTGELFF   | 07-09 | 02-02 | 1.8620            |                   |                   |  |
|                    |       |       | <b>RE #08-a</b>   | <b>RE #08-CSF</b> |                   |  |
| CASSITDQYF         | 09-01 | 02-03 | 0.0009            | 1.7383            |                   |  |
| CASSPPSGSKGEQFF    | 18-01 | 02-01 | 0.0969            | 1.4450            |                   |  |
| CASRMTSGSSGELFF    | 14-01 | 02-02 | 0.0008            | 1.3351            |                   |  |
| CASSPTASTNEKLFF    | 06-05 | 01-04 | 0.0826            | 0.9873            |                   |  |
| CASSLVTGNGEKLFF    | 07-06 | 01-04 | 0.0833            | 0.9827            |                   |  |
| CASSALAGPYEQYF     | 28-01 | 02-07 | 0.0107            | 0.9334            |                   |  |
| CASSSLGQGAQNIQYF   | 12    | 02-04 | 0.0883            | 0.6934            |                   |  |
| CASSQKERGGSSDQYF   | 03    | 02-03 | 0.0852            | 0.5596            |                   |  |
| CASSRLGQETQYF      | 07-06 | 02-05 | 0.0049            | 0.5076            |                   |  |
| CASSQTNAGGEQYF     | 03    | 02-07 | 0.0020            | 0.4488            |                   |  |
|                    |       |       | <b>RE #08-B</b>   | <b>RE #08-CSF</b> |                   |  |

|                   |       |       |                   |                   |                   |                   |
|-------------------|-------|-------|-------------------|-------------------|-------------------|-------------------|
| CASSITDTQYF       | 09-01 | 02-03 | 0.0010            | 1.7384            |                   |                   |
| CASSPPSGSKGEQFF   | 18-01 | 02-01 | 0.0030            | 1.4451            |                   |                   |
| CASSPTASTNEKLFF   | 06-05 | 01-04 | 0.0288            | 0.9874            |                   |                   |
| CASSLVTGNKEKLF    | 07-06 | 01-04 | 0.0234            | 0.9828            |                   |                   |
| CASSYVGQQNTEAFF   | 06-05 | 01-01 | 0.0023            | 0.9372            |                   |                   |
| CASSALAGPYEQYF    | 28-01 | 02-07 | 0.0075            | 0.9335            |                   |                   |
| CASSSLGQGAKNIQYF  | 12    | 02-04 | 0.0681            | 0.6935            |                   |                   |
| CASSQKERGGSSDTQYF | 03    | 02-03 | 0.0020            | 0.5597            |                   |                   |
| CASSEVSAGTGVYEQYF | 02-01 | 02-07 | 0.0287            | 0.5364            |                   |                   |
| CASSLERTDTQYF     | 05-01 | 02-03 | 0.0026            | 0.5085            |                   |                   |
|                   |       |       | <b>RE #08-c</b>   | <b>RE #08-CSF</b> |                   |                   |
| CASSITDTQYF       | 09-01 | 02-03 | 0.0020            | 1.7384            |                   |                   |
| CASSPPSGSKGEQFF   | 18-01 | 02-01 | 0.0017            | 1.4451            |                   |                   |
| CASSPTASTNEKLFF   | 06-05 | 01-04 | 0.0422            | 0.9874            |                   |                   |
| CASSLVTGNKEKLF    | 07-06 | 01-04 | 0.0555            | 0.9828            |                   |                   |
| CASSALAGPYEQYF    | 28-01 | 02-07 | 0.0094            | 0.9335            |                   |                   |
| CASSSLGQGAKNIQYF  | 12    | 02-04 | 0.1113            | 0.6935            |                   |                   |
| CASSQKERGGSSDTQYF | 03    | 02-03 | 0.0004            | 0.5597            |                   |                   |
| CASSEVSAGTGVYEQYF | 02-01 | 02-07 | 0.0150            | 0.5364            |                   |                   |
| CSVEGQIQETQYF     | 29-01 | 02-05 | 0.0007            | 0.4393            |                   |                   |
| CASRLNTEAFF       | 06-05 | 01-01 | 0.0194            | 0.4387            |                   |                   |
|                   |       |       | <b>RE #08-a</b>   | <b>RE #08-b</b>   | <b>RE #08-c</b>   | <b>RE #08-CSF</b> |
| CASSITDTQYF       | 09-01 | 02-03 | 0.0009            | 0.0010            | 0.0020            | 1.7384            |
| CASSPPSGSKGEQFF   | 18-01 | 02-01 | 0.0969            | 0.0030            | 0.0017            | 1.4451            |
| CASSPTASTNEKLFF   | 06-05 | 01-04 | 0.0827            | 0.0288            | 0.0422            | 0.9874            |
| CASSLVTGNKEKLF    | 07-06 | 01-04 | 0.0833            | 0.0234            | 0.0555            | 0.9828            |
| CASSALAGPYEQYF    | 28-01 | 02-07 | 0.0107            | 0.0075            | 0.0094            | 0.9335            |
| CASSSLGQGAKNIQYF  | 12    | 02-04 | 0.0883            | 0.0681            | 0.1113            | 0.6935            |
| CASSQKERGGSSDTQYF | 03    | 02-03 | 0.0853            | 0.0020            | 0.0004            | 0.5597            |
| CASRLNTEAFF       | 06-05 | 01-01 | 0.0221            | 0.0100            | 0.0194            | 0.4387            |
| CASSLNQPPHF       | 05-06 | 01-05 | 0.0073            | 0.0041            | 0.0178            | 0.4152            |
| CASSLVGIVDEQYF    | 05-04 | 02-07 | 0.0088            | 0.0039            | 0.0008            | 0.4121            |
|                   |       |       | <b>RE #08-CSF</b> |                   |                   |                   |
| CASSITDTQYF       | 28-01 | 02-03 | 1.7384            |                   |                   |                   |
| CASLVNTEAFF       | 06-06 | 01-01 | 1.5032            |                   |                   |                   |
| CASSPPSGSKGEQFF   | 18-01 | 02-01 | 1.4451            |                   |                   |                   |
| CASSFLGTGANVLF    | 07-09 | 02-06 | 1.3685            |                   |                   |                   |
| CASRMTSGSSGELFF   | 14-01 | 02-02 | 1.3352            |                   |                   |                   |
| CASSYGENEKLFF     | 06-05 | 01-04 | 1.1276            |                   |                   |                   |
| CASSSGTSLNEQFF    | 06-05 | 02-01 | 1.0624            |                   |                   |                   |
| CASSPTASTNEKLFF   | 06-05 | 01-04 | 0.9874            |                   |                   |                   |
| CASSLEGVNTQYF     | 11-02 | 02-03 | 0.9834            |                   |                   |                   |
| CASSLVTGNKEKLF    | 07-06 | 01-04 | 0.9828            |                   |                   |                   |
|                   |       |       | <b>RE #20-a</b>   | <b>RE #20-CSF</b> |                   |                   |
| CASSQGPTQYF       | 04-03 | 02-05 | 0.0032            | 0.7655            |                   |                   |
| CASNYITSGYEYQYF   | 07    | 02-07 | 0.5246            | 0.7508            |                   |                   |
| CATRIGDTEAFF      | 19-01 | 01-01 | 0.0027            | 0.7030            |                   |                   |
| CATDTGPDSEYQYF    | 10-03 | 02-07 | 0.9471            | 0.6136            |                   |                   |
| CASSPHRGPSDTQYF   | 07-08 | 02-03 | 0.1082            | 0.5695            |                   |                   |
| CASSTDSETLTGELFF  | 12    | 02-02 | 0.3818            | 0.5548            |                   |                   |
| CAIRSMNTEAFF      | 10-03 | 01-01 | 0.0015            | 0.4581            |                   |                   |
| CASDTRDSNQPQHF    | 19-01 | 01-05 | 0.3212            | 0.4005            |                   |                   |
| CASSGGGFSFYEYQYF  | 19-01 | 02-07 | 0.0101            | 0.3135            |                   |                   |
| CASSMGTGDHEQYF    | 19-01 | 02-07 | 0.0998            | 0.3050            |                   |                   |
|                   |       |       | <b>RE #20-b</b>   | <b>RE #20-CSF</b> |                   |                   |
| CASNYITSGYEYQYF   | 07    | 02-07 | 0.2133            | 0.7508            |                   |                   |
| CASSIEGRSTQPQHF   | 19-01 | 01-05 | 0.0010            | 0.6197            |                   |                   |
| CATDTGPDSEYQYF    | 10-03 | 02-07 | 0.3448            | 0.6136            |                   |                   |
| CASSPHRGPSDTQYF   | 07-08 | 02-03 | 0.0399            | 0.5695            |                   |                   |
| CASSTDSETLTGELFF  | 12    | 02-02 | 0.0972            | 0.5548            |                   |                   |
| CASDTRDSNQPQHF    | 19-01 | 01-05 | 0.2390            | 0.4005            |                   |                   |
| CATLASGQETQYF*    | 07-09 | 02-05 | 4.3104            | 0.3540            |                   |                   |
| CASSGGGFSFYEYQYF  | 19-01 | 02-07 | 0.0045            | 0.3135            |                   |                   |
| CASSMGTGDHEQYF    | 19-01 | 02-07 | 0.1077            | 0.3050            |                   |                   |
| CASSSRASGGQETQYF  | 28-01 | 02-05 | 0.2021            | 0.2976            |                   |                   |
|                   |       |       | <b>RE #20-a</b>   | <b>RE #20-b</b>   | <b>RE #20-CSF</b> |                   |
| CASNYITSGYEYQYF   | 07    | 02-07 | 0.5246            | 0.2133            | 0.7508            |                   |
| CATDTGPDSEYQYF    | 10-03 | 02-07 | 0.9471            | 0.3448            | 0.6136            |                   |
| CASSPHRGPSDTQYF   | 07-08 | 02-03 | 0.1082            | 0.0399            | 0.5695            |                   |
| CASSTDSETLTGELFF  | 12    | 02-02 | 0.3818            | 0.0972            | 0.5548            |                   |
| CASDTRDSNQPQHF    | 19-01 | 01-05 | 0.3212            | 0.2390            | 0.4005            |                   |
| CASSGGGFSFYEYQYF  | 19-01 | 02-07 | 0.0101            | 0.0045            | 0.3135            |                   |



|                  |       |       |                   |        |        |  |
|------------------|-------|-------|-------------------|--------|--------|--|
| CASSMGTGDHEQYF   | 19-01 | 02-07 | 0.0998            | 0.1077 | 0.3050 |  |
| CASSSRASGGQETQYF | 28-01 | 02-05 | 0.2782            | 0.2021 | 0.2976 |  |
| CASSSEPGLAVNTQYF | 05-01 | 02-03 | 0.0016            | 0.0020 | 0.2621 |  |
| CASSPGPGEKLFF    | 12    | 01-04 | 0.0267            | 0.0040 | 0.2486 |  |
|                  |       |       | <b>RE #20-CSF</b> |        |        |  |
| CASSTQSYKAFF     | 07-02 | 01-01 | 1.0178            |        |        |  |
| CASSQGPTQYF      | 04-03 | 02-05 | 0.7545            |        |        |  |
| CASNYITSGYEQYF   | 07    | 02-07 | 0.7459            |        |        |  |
| CATRIGDTEAFF     | 19-01 | 01-01 | 0.7030            |        |        |  |
| CASSFQGLDGYTF    | 07-02 | 01-02 | 0.6810            |        |        |  |
| CATDTGPDSEYQYF   | 10-03 | 02-07 | 0.6136            |        |        |  |
| CASSLDIDGYTF     | 07-02 | 01-02 | 0.5903            |        |        |  |
| CASSFTRRQQETQYF  | 07-09 | 02-05 | 0.5732            |        |        |  |
| CASSTDSETLTGELFF | 12    | 02-02 | 0.5548            |        |        |  |
| CASSIEGRSTQPQHF  | 19-01 | 01-05 | 0.5438            |        |        |  |

Listed are the shared clonotypes (amino-acid sequence, Vb and Jb genes, frequency in either peripheral samples (peri.) or the CSF). The CDR3 sequence marked by an asterisk expanded during treatment with basiliximab to the highest peripheral frequency (4.3%) and could later be found in the CSF.
